# Supplementary material for: The law of emergency representation by spouses: A handout from the Ethics Section of the German Interdisciplinary Association for Intensive Care and Emergency Medicine (DIVI)
Source: PubMed Central journal article supplement — Dtsch Med Wochenschr. 2023 Mar 20;148(8):499–502. [Article in German] doi: 10.1055/a-2017-0878 (PMC10060051; doi:10.1055/a-2017-0878), 2023-03-20
Supplement: dmw-20170878_10-1055-a-2017-0878-s.pdf [file dmw-20170878_10-1055-a-2017-0878-s.pdf]

### **§ 1358 Gegenseitige Vertretung von Ehegatten in Angelegenheiten der Gesundheitssorge**

- (1) Kann ein Ehegatte aufgrund von Bewusstlosigkeit oder Krankheit seine Angelegenheiten der Gesundheitssorge rechtlich nicht besorgen (vertretener Ehegatte), ist der andere Ehegatte (vertretender Ehegatte) berechtigt, für den vertretenen Ehegatten
1. in Untersuchungen des Gesundheitszustandes, Heilbehandlungen oder ärztliche Eingriffe einzuwilligen oder sie zu untersagen sowie ärztliche Aufklärungen entgegenzunehmen,
  2. Behandlungsverträge, Krankenhausverträge oder Verträge über eilige Maßnahmen der Rehabilitation und der Pflege abzuschließen und durchzusetzen,
  3. über Maßnahmen nach § 1831 Absatz 4 zu entscheiden, sofern die Dauer der Maßnahme im Einzelfall sechs Wochen nicht überschreitet, und
  4. Ansprüche, die dem vertretenen Ehegatten aus Anlass der Erkrankung gegenüber Dritten zustehen, geltend zu machen und an die Leistungserbringer aus den Verträgen nach Nummer 2 abzutreten oder Zahlung an diese zu verlangen.
- (2) Unter den Voraussetzungen des Absatzes 1 und hinsichtlich der in Absatz 1 Nummer 1 bis 4 genannten Angelegenheiten sind behandelnde Ärzte gegenüber dem vertretenden Ehegatten von ihrer Schweigepflicht entbunden. Dieser darf die diese Angelegenheiten betreffenden Krankenunterlagen einsehen und ihre Weitergabe an Dritte bewilligen.
- (3) Die Berechtigungen nach den Absätzen 1 und 2 bestehen nicht, wenn 1. die Ehegatten getrennt leben, 2. dem vertretenden Ehegatten oder dem behandelnden Arzt bekannt ist, dass der vertretene Ehegatte
- a) eine Vertretung durch ihn in den in Absatz 1 Nummer 1 bis 4 genannten Angelegenheiten ablehnt oder
  - b) jemanden zur Wahrnehmung seiner Angelegenheiten bevollmächtigt hat, soweit diese Vollmacht die in Absatz 1 Nummer 1 bis 4 bezeichneten Angelegenheiten umfasst, 3. für den vertretenen Ehegatten ein Betreuer bestellt ist, soweit dessen Aufgabenkreis die in Absatz 1 Nummer 1 bis 4 bezeichneten Angelegenheiten umfasst, oder 4. die Voraussetzungen des Absatzes 1 nicht mehr vorliegen oder mehr als sechs Monate seit dem durch den Arzt nach Absatz 4 Satz 1 Nummer 1 festgestellten Zeitpunkt vergangen sind.
- (4) Der Arzt, gegenüber dem das Vertretungsrecht ausgeübt wird, hat
1. das Vorliegen der Voraussetzungen des Absatzes 1 und den Zeitpunkt, zu dem diese spätestens eingetreten sind, schriftlich zu bestätigen,
  2. dem vertretenden Ehegatten die Bestätigung nach Nummer 1 mit einer schriftlichen Erklärung über das Vorliegen der Voraussetzungen des Absatzes 1 und das Nichtvorliegen der Ausschlussgründe des Absatzes 3 vorzulegen und
  3. sich von dem vertretenden Ehegatten schriftlich versichern zu lassen, dass
    - a) das Vertretungsrecht wegen der Bewusstlosigkeit oder Krankheit, aufgrund derer der Ehegatte seine Angelegenheiten der Gesundheitssorge rechtlich nicht besorgen kann, bisher nicht ausgeübt wurde und
    - b) kein Ausschlussgrund des Absatzes 3 vorliegt.

Quelle: Bundesgesetzblatt (2021) Gesetz zur Reform des Vormundschafts- und Betreuungsrechts vom 4. Mai 2021. In:

[https://www.bgbl.de/xaver/bgbl/start.xav?startbk=Bundesanzeiger\\_BGBl&start=//\[\\*\]@attr\\_id=%27bgbl121s0882.pdf%27\]#\\_bgbl\\_%2F%2F\\*%5B%40attr\\_id%3D%27bgbl121s0882.pdf%27%5D\\_1674145412560](https://www.bgbl.de/xaver/bgbl/start.xav?startbk=Bundesanzeiger_BGBl&start=//[*]@attr_id=%27bgbl121s0882.pdf%27]#_bgbl_%2F%2F*%5B%40attr_id%3D%27bgbl121s0882.pdf%27%5D_1674145412560)
